# Supplementary material for: Genetic Architecture of Adaptive Immune System Identifies Key Immune Regulators
Source: PubMed Central journal article supplement (PMC6205839; doi:10.1016/j.celrep.2018.09.048), 2018-10-16
Supplement: mmc1.pdf [file mmc1.pdf]

**Cell Reports, Volume 25**

## **Supplemental Information**

### **Genetic Architecture of Adaptive Immune System Identifies Key Immune Regulators**

**Vasiliki Lagou, Josselyn E. Garcia-Perez, Ide Smets, Lies Van Horebeek, Marijne Vandebergh, Liye Chen, Klara Mallants, Teresa Prezzemolo, Kelly Hilven, Stephanie Humblet-Baron, Matthieu Moisse, Philip Van Damme, Guy Boeckxstaens, Paul Bowness, Bénédicte Dubois, James Dooley, Adrian Liston, and An Goris**

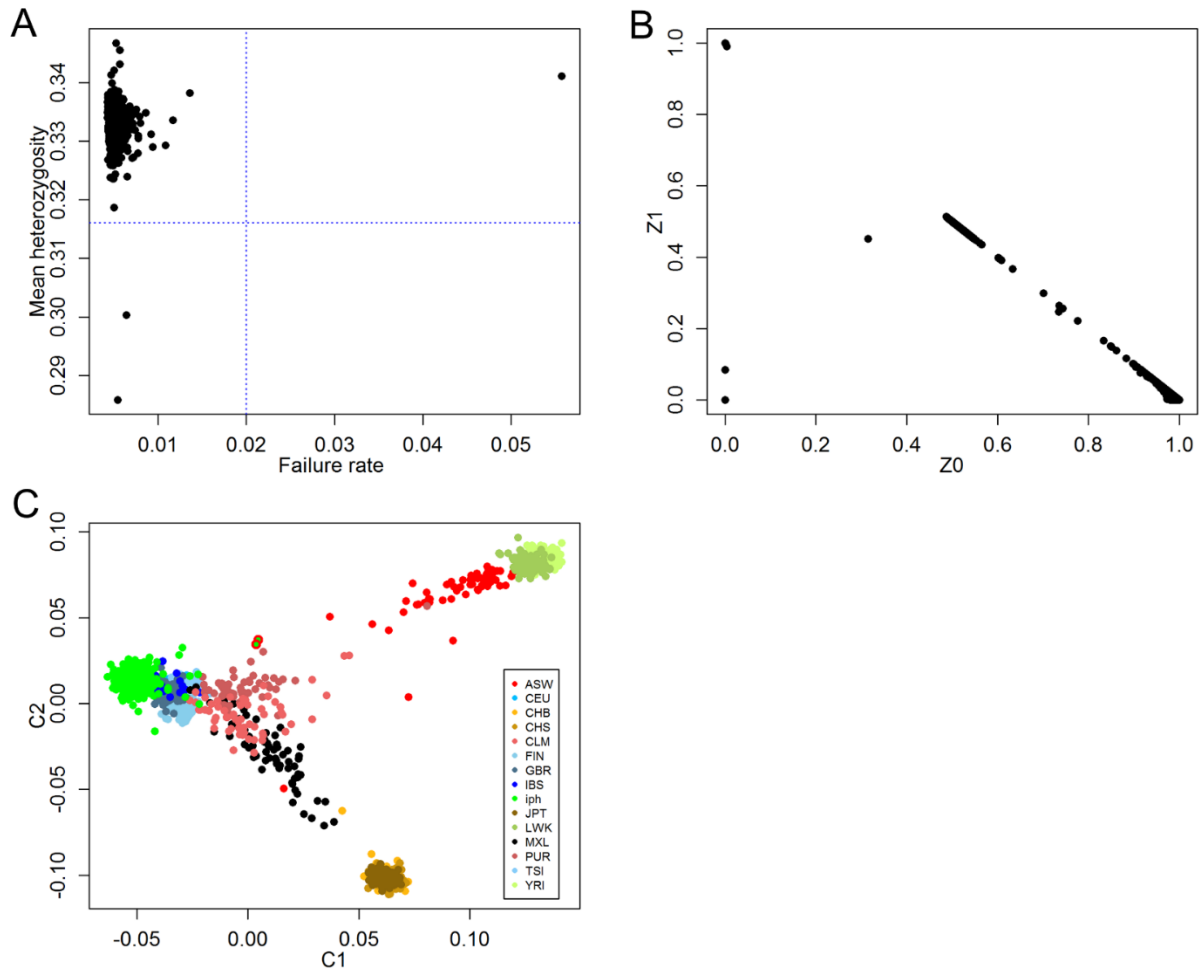

**Figure S1. Sample quality control (QC) steps. Related to STAR Methods.**

$n = 502$  samples were genotyped, and quality control (QC) was performed as described in the STAR Methods.  $n = 13$  samples failed QC because of the following reasons: genotyping failure rate and heterozygosity (A.,  $n = 3$ ), duplicates and relatedness (B.,  $n = 8$ ) and ethnicity (C.,  $n = 2$ ).  $n = 489$  samples passed QC and were used as input for imputation as described in the STAR Methods.

#### A. Genotyping failure rate versus heterozygosity.

Sample QC was based on the set of variants meeting minor allele frequency (MAF)  $\geq 5\%$ , genotyping success rate  $\geq 98\%$  and Hardy-Weinberg  $P > 10^{-6}$ . Three samples with genotype call rate  $< 98\%$  (1 sample) or excess heterozygosity ( $> 5$  standard deviations from the mean) (2 samples) failed QC.

#### B. Identity-by-descent (IBD) analysis.

For the IBD analysis, we removed regions of extended linkage disequilibrium (LD) from the dataset and pruned remaining regions so that no pair of variants within a given window of 50 kb is correlated ( $r^2 > 0.2$ ). The X- and Y- axis represent  $Z_0$  ( $P(\text{IBD} = 0)$ ) and  $Z_1$  ( $P(\text{IBD} = 1)$ ), the probabilities of sharing 0 or 1 alleles identical-by-descent. Four samples were identified as duplicates (expected  $Z_0 = Z_1 = 0$ ), three samples as parent-offspring ( $Z_0 = 0$  and  $Z_1 = 1$ ), and one sample as half-sibling (expected  $Z_0 = Z_1 = 0.5$ ).

#### C. Principal component analysis.

The first two principal components (C1 and C2) are calculated for the current dataset (Iph, bright green) together with 1000G Phase 1 data for the following populations: ASW = Americans of African Ancestry in SW USA; CEU = Utah Residents (CEPH) with Northern and Western European Ancestry; CHB = Han Chinese in Beijing, China; CHS = Southern Han Chinese; CLM = Colombians from Medellin, Colombia; FIN = Finnish in Finland; GBR = British in England and Scotland; IBS = Iberian Population in Spain; JPT = Japanese in Tokyo, Japan; LWK = Luhya in Webuye, Kenya; MXL = Mexican Ancestry from Los Angeles USA; PUR = Puerto Ricans from Puerto Rico; TSI = Toscani in Italia; YRI = Yoruba in Ibadan, Nigeria). Two individuals (green encircled with orange) were removed as outliers from the European cluster. Further inspection revealed these individuals as being of North-African descent.

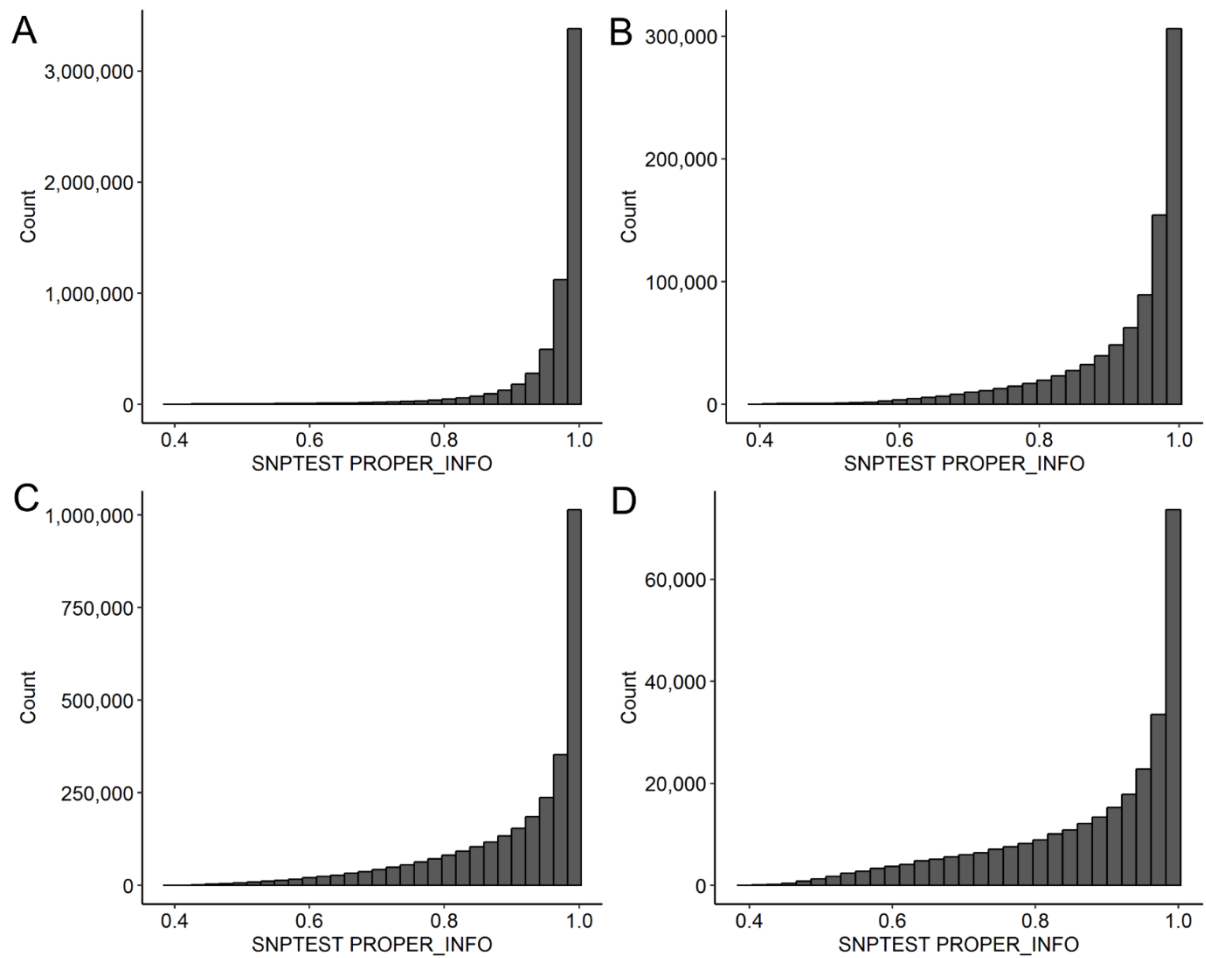

**Figure S2. Imputation quality for genetic variants included upon QC. Related to STAR Methods.**  
 Histograms of the imputation quality scores (average SNPTEST PROPER\_INFO across association results for  $n = 54$  traits) for the following categories amongst 10,246,977 autosomal variants:

- A.** Common (MAF > 5%) single-nucleotide variants ( $n = 6,086,969$ )
- B.** Common (MAF > 5%) indels/structural variants ( $n = 907,465$ )
- C.** Less common ( $1\% \leq \text{MAF} \leq 5\%$ ) single-nucleotide variants ( $n = 2,962,706$ )
- D.** Less common ( $1\% \leq \text{MAF} \leq 5\%$ ) indels/structural variants ( $n = 289,837$ )
